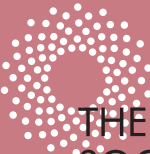

Published by  
**THE AMERICAN  
SOCIETY FOR  
CELL  
BIOLOGY**

*The science of life, the life of science*

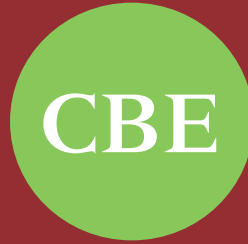

# Life Sciences Education

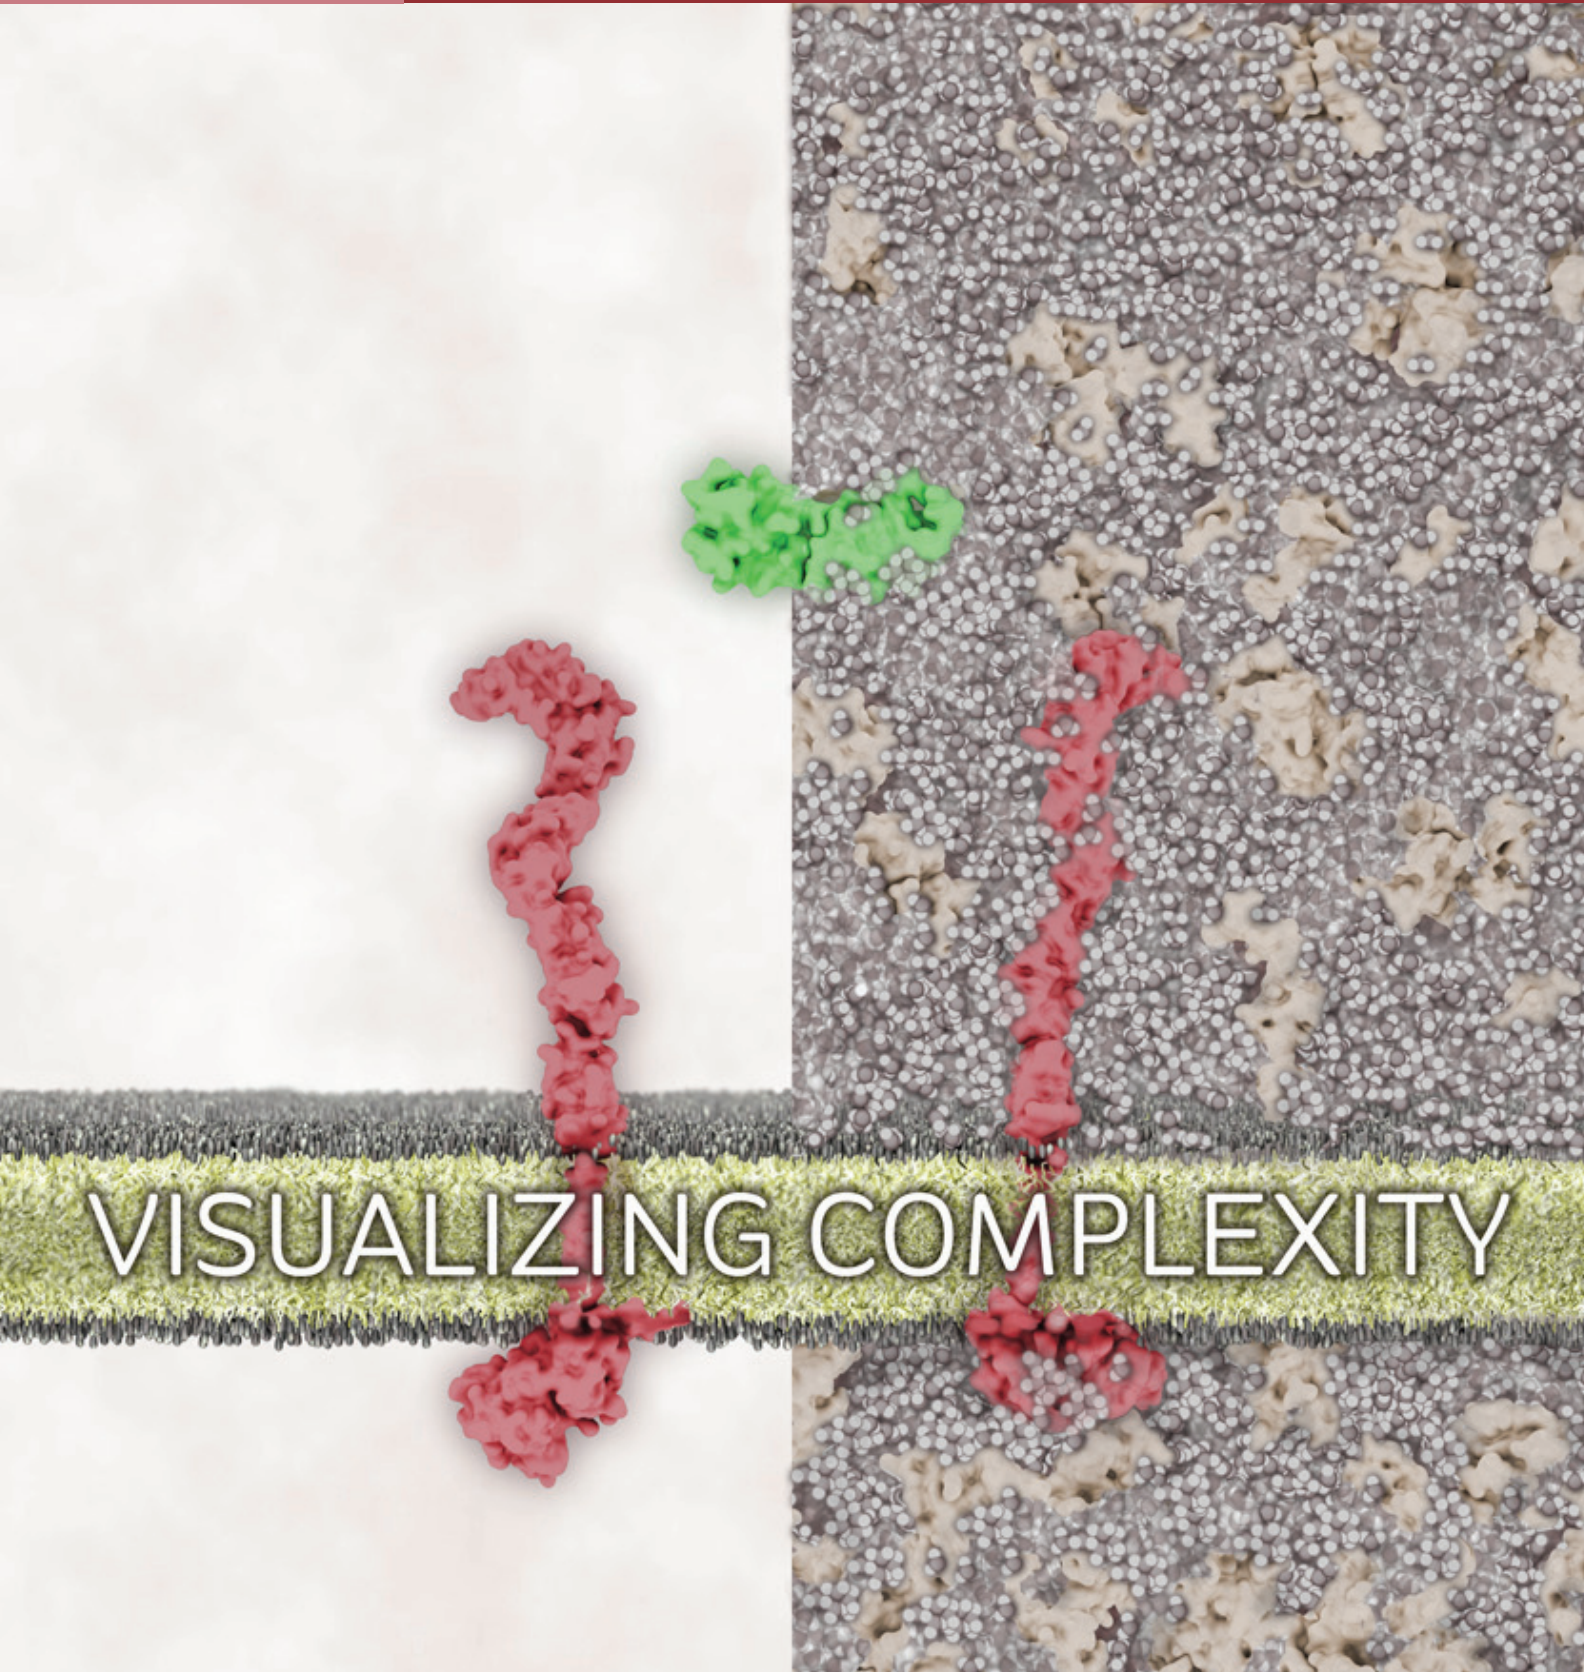

**VISUALIZING COMPLEXITY**
