# Table of Contents

## FEATURES

### *Letter to the Editor*

**Catching Education Up with Technology: Preparing the Public to Make Informed Choices about Personal Genetics**

M. E. Gelbart . . . . . 1–2

### *Approaches to Biology Teaching and Learning*

**The Role of the Lecturer as Tutor: Doing What Effective Tutors Do in a Large Lecture Class**

William B. Wood and Kimberly D. Tanner . . . . . 3–9

### *From the National Academies*

**Evolution Education across the Life Sciences: Making Biology Education Make Sense**

Cynthia A. Wei, Paul M. Beardsley, and Jay B. Labov . . . . . 10–16

## ESSAYS

**Writing-to-Learn in Undergraduate Science Education: A Community-Based, Conceptually Driven Approach**

Julie A. Reynolds, Christopher Thaiss, Wendy Katkin, and Robert J. Thompson, Jr. . . . . 17–25

**Using Science Songs to Enhance Learning: An Interdisciplinary Approach**

Gregory Crowther . . . . . 26–30

**Molecular Thermodynamics for Cell Biology as Taught with Boxes**

Luis S. Mayorga, María José López, and Wayne M. Becker . . . . . 31–38

## ARTICLES

**The Utility of Writing Assignments in Undergraduate Bioscience**

Julie Libarkin and Gabriel Ording . . . . . 39–46

**Exploring Undergraduates' Understanding of Photosynthesis Using Diagnostic Question Clusters**

Joyce M. Parker, Charles W. Anderson, Merle Heidemann, John Merrill, Brett Merritt, Gail Richmond, and Mark Urban-Lurain . . . . . 47–57

**Using Targeted Active-Learning Exercises and Diagnostic Question Clusters to Improve Students' Understanding of Carbon Cycling in Ecosystems**

April Cordero Maskiewicz, Heather Peckham Griscom, and Nicole Turrill Welch . . . . . 58–67

**Using Student Learning and Development Outcomes to Evaluate a First-Year Undergraduate Group Video Project**

Murray Jensen, Allison Mattheis, and Brady Johnson . . . . . 68–80

**Using Comparative Genomics for Inquiry-Based Learning to Dissect Virulence of *Escherichia coli* O157:H7 and *Yersinia pestis***

David J. Baumler, Lois M. Banta, Kai F. Hung, Jodi A. Schwarz, Eric L. Cabot, Jeremy D. Glasner, and Nicole T. Perna . . . . . 81–93

**Teaching the Biological Consequences of Alcohol Abuse through an Online Game: Impacts among Secondary Students**

Yvonne Klisch, Leslie M. Miller, Margaret E. Beier, and Shu Wang . . . . . 94–102

**Visualizing Protein Interactions and Dynamics: Evolving a Visual Language for Molecular Animation**

Jodie Jenkinson and Gaël McGill . . . . . 103–110

## CORRECTIONS

**Harnessing Technology to Improve Formative Assessment of Student Conceptions in STEM: Forging a National Network**

Kevin C. Haudek, Jennifer J. Kaplan, Jennifer Knight, Tammy Long, John Merrill, Alan Munn, Ross Nehm, Michelle Smith, and Mark Urban-Lurain . . . . . 111

**Online Teaching Tool Simplifies Faculty Use of Multimedia and Improves Student Interest and Knowledge in Science**

John P. Walsh, Jerry Chih-Yuan Sun, and Michelle Riconscente . . . . . 112

### *On the Cover*

Our insight into human health and disease is dependent on our ability to understand dynamic and increasingly complex cellular and molecular processes. Three-dimensional (3D) visualizations have the potential to transform the way we think about the cellular and molecular world since they offer a glimpse into events beyond the reach of human senses. A study by Jodie Jenkinson and Gaël McGill (see page 103) examined the relative effectiveness of 3D visualization techniques for learning about protein conformation and molecular motion in association with a ligand/receptor binding event. Stem cell factor ligand and cKit receptor tyrosine kinase, pictured here, were used as a classical example of a ligand-induced receptor dimerization and activation event. Illustration by Eric Keller, Gaël McGill, and Jodie Jenkinson.
